# Supplementary material for: One step preparation of a biocompatible, antimicrobial reduced graphene oxide–silver nanohybrid as a topical antimicrobial agent
Source: Royal Society of Chemistry journal article supplement (doi:10.1039/c3ra46835f), 2013-12-12
Supplement: c3ra46835f.pdf [file c3ra46835f.pdf]

**Supplementary information**

**One step preparation of biocompatible reduced graphene oxide-silver nanohybrid for topical antimicrobial applications**

**Shaswat Barua<sup>a</sup>, Suman Thakur<sup>a</sup>, Lipika Aidew<sup>b</sup>, Alak K. Buragohain<sup>b</sup>, Pronobesh Chattopadhyay<sup>c</sup>  
and Niranjan Karak<sup>a\*</sup>**

<sup>a</sup> Advanced Polymer and Nanomaterial Laboratory, Department of Chemical Sciences, Tezpur University, Napaam-784028, Assam, India

<sup>b</sup> Department of Molecular Biology and Biotechnology, Tezpur University, Napaam-784028, Assam, India

<sup>c</sup> Defence Research Laboratory, Tezpur, Assam, India

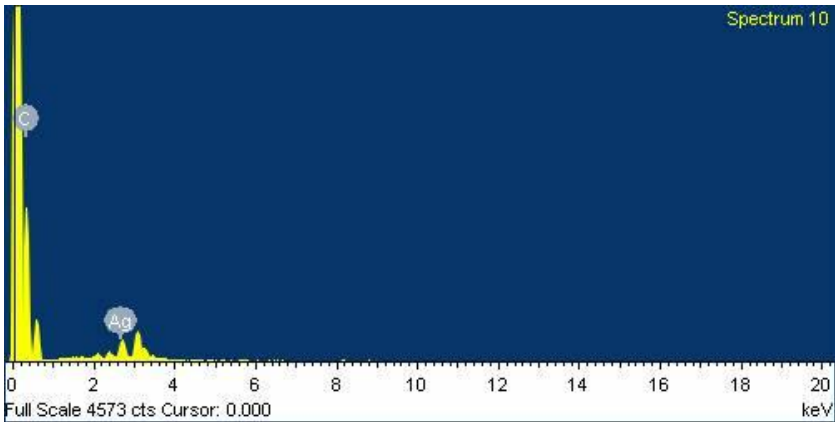

Fig. S1: EDX data of Ag-RGO

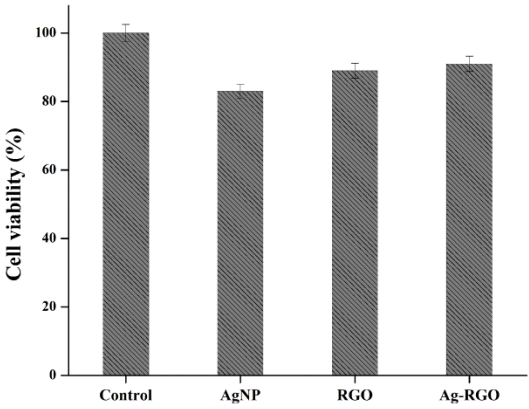

Fig. S2: Cell survival test, via MTT assay

**Supplementary Table S1: EDX data for loading of silver in the Ag-RGO**

| Element | Weight% | Atomic% |
|---------|---------|---------|
| C       | 84.47   | 97.99   |
| Ag      | 15.53   | 2.01    |

**Supplementary Table S2.** Sensitization Score, Rate, Grade, and Classification

| Group   | Sensitization rate (%) | Sensitization grade | Sensitization classification <sup>a</sup> |
|---------|------------------------|---------------------|-------------------------------------------|
| Control | 0                      | I                   | Weak                                      |
| Treated | 0                      | I                   | Weak                                      |
